# Supplementary figures and images for: Invariant neural subspaces maintained by feedback modulation
Source: eLife journal article supplement (doi:10.7554/elife.76096), 2022-04-20

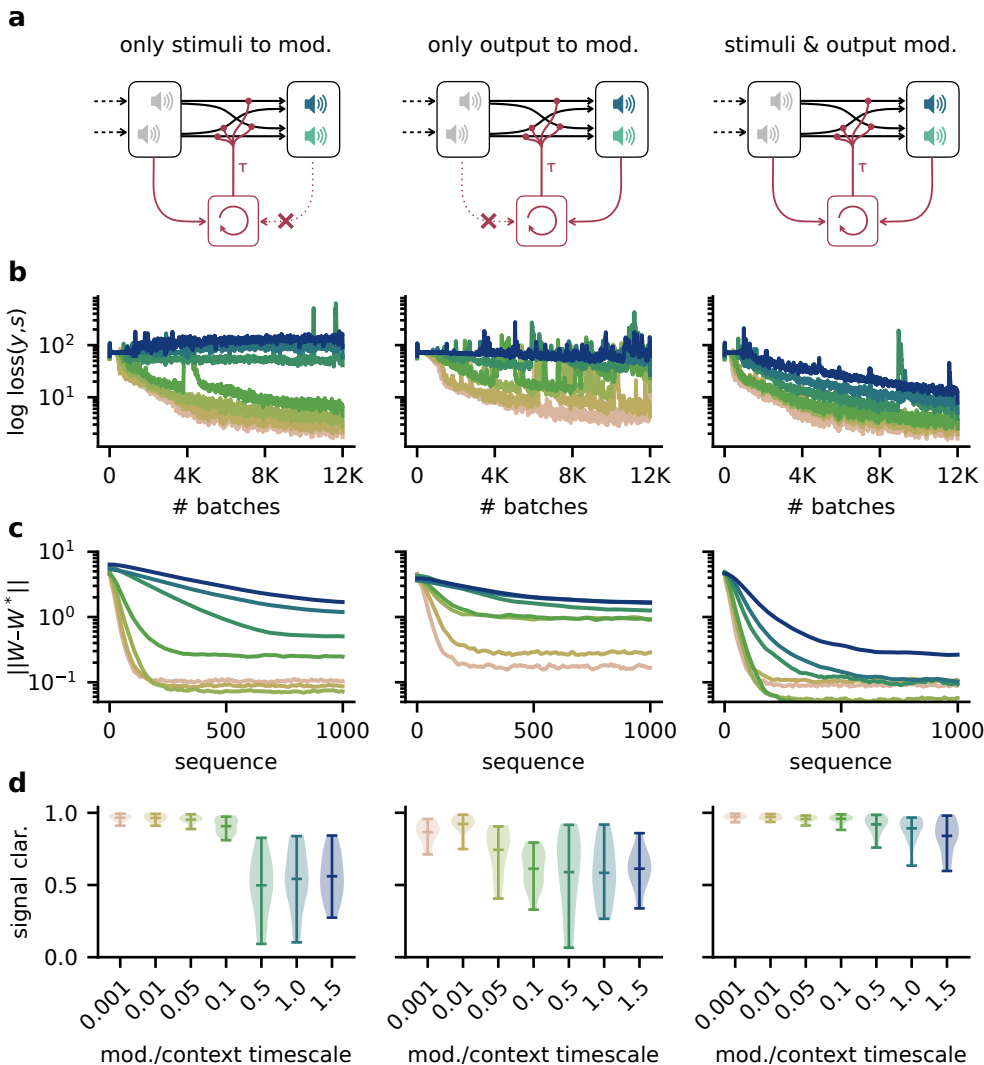

Supplement: supp [file elife-76096-supp-v1.zip]

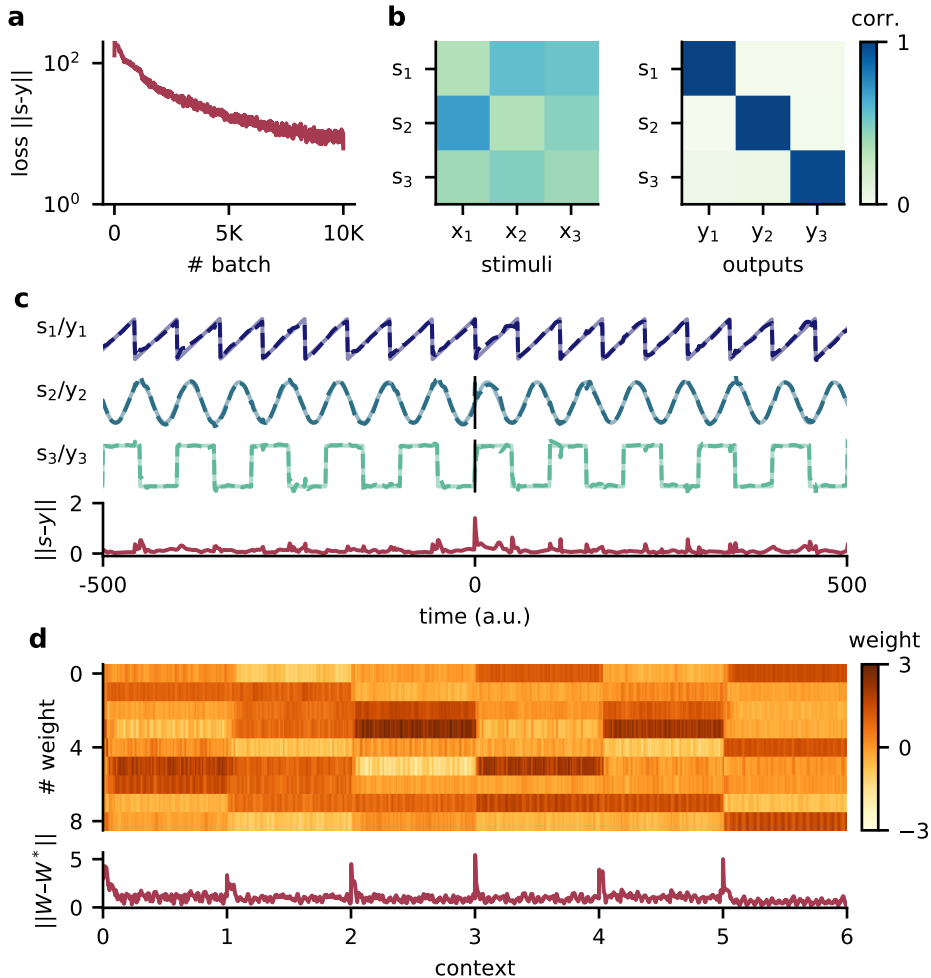

Supplement: supp [file elife-76096-supp-v1.zip]

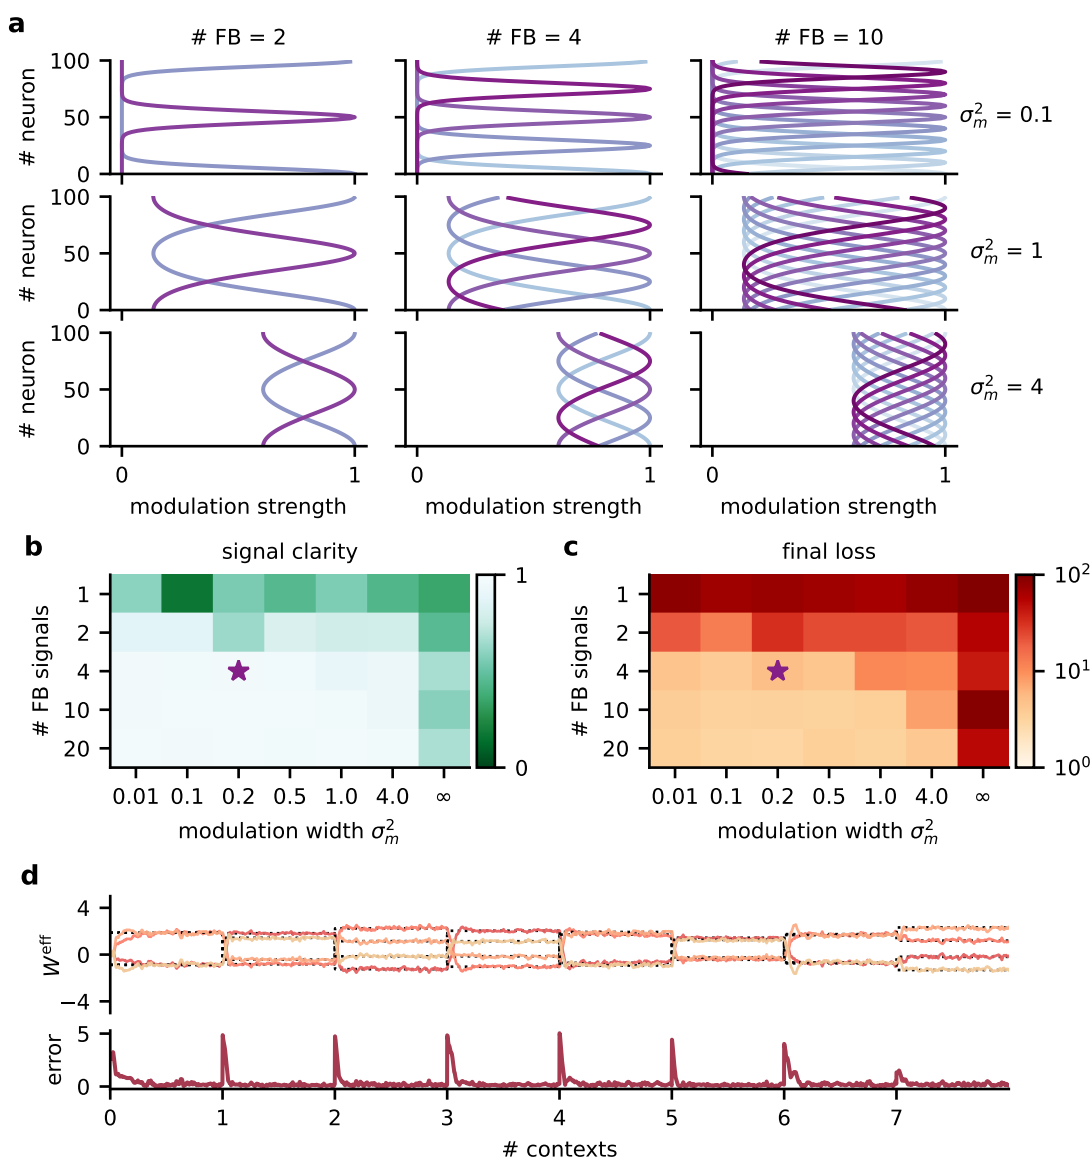

Supplement: supp [file elife-76096-supp-v1.zip]

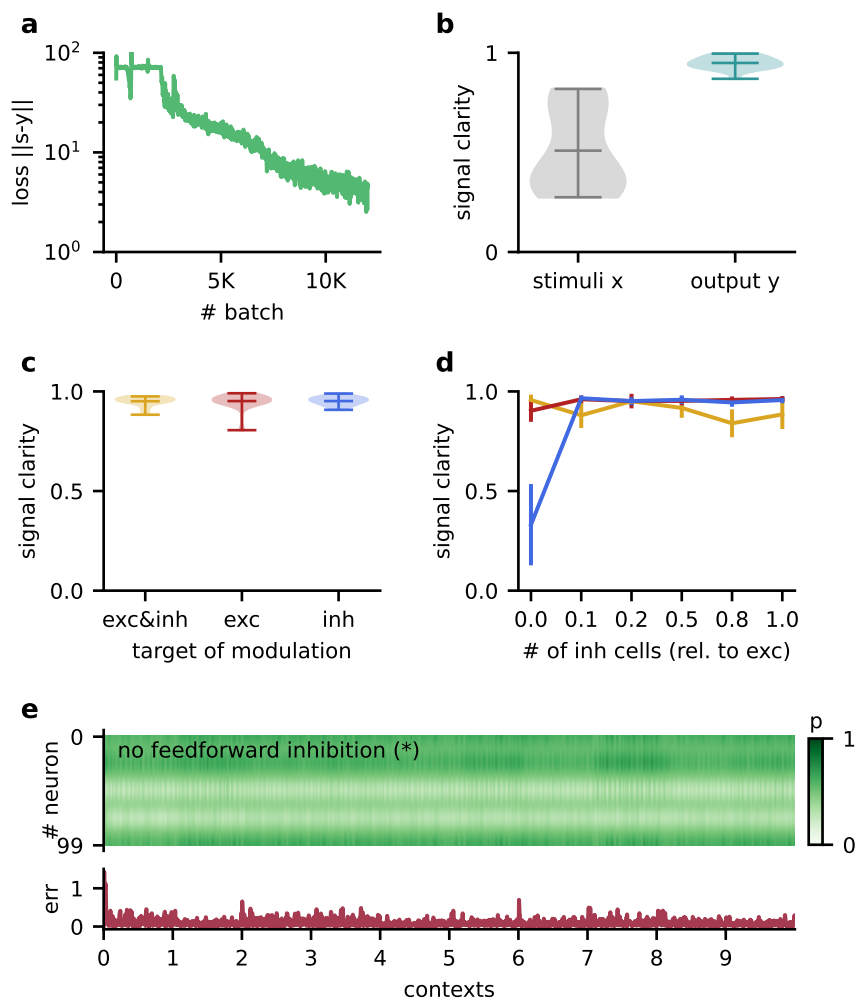

Supplement: supp [file elife-76096-supp-v1.zip]

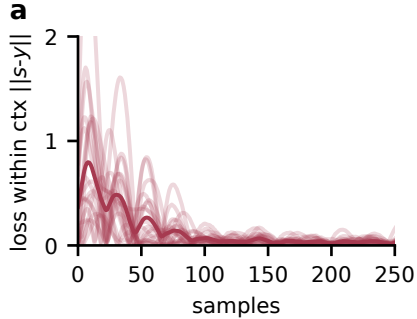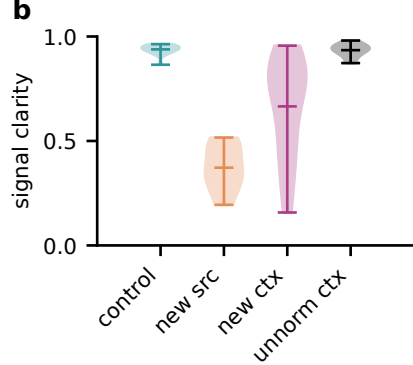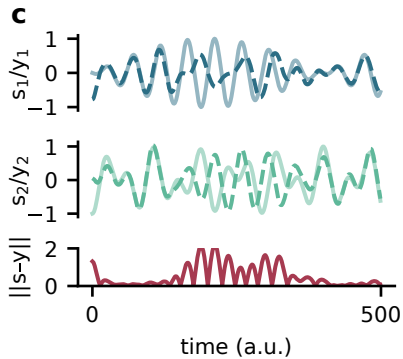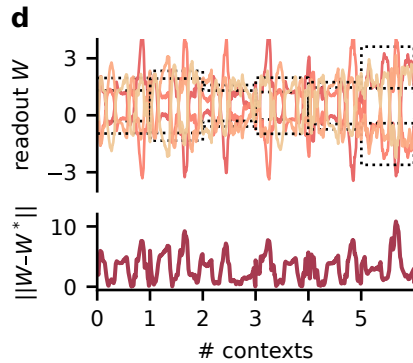

Supplement: supp [file elife-76096-supp-v1.zip]

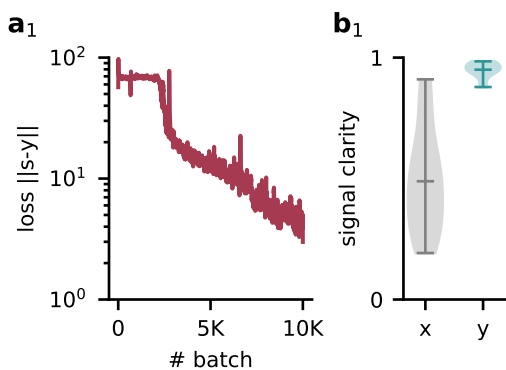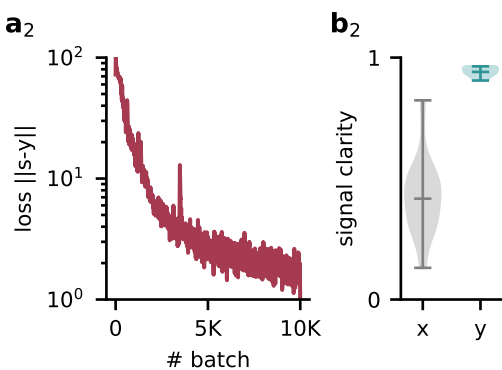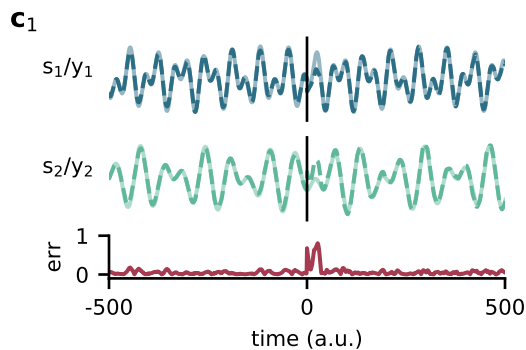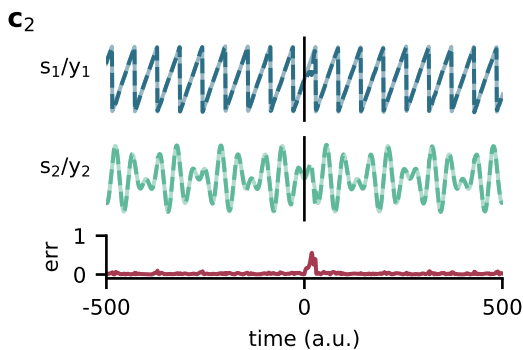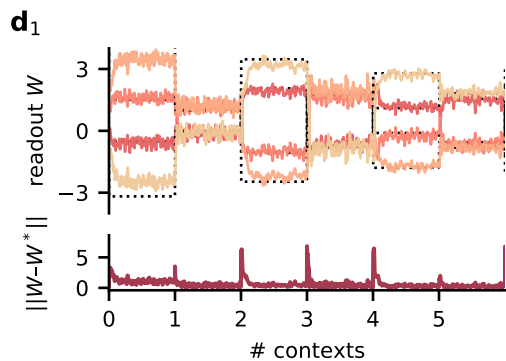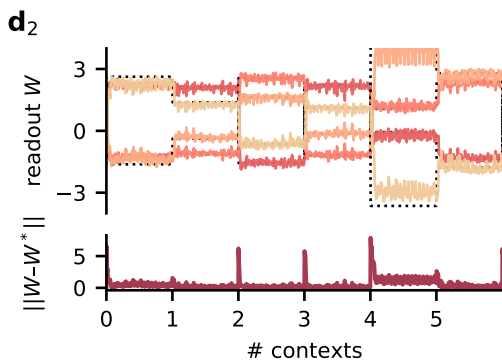

Supplement: supp [file elife-76096-supp-v1.zip]

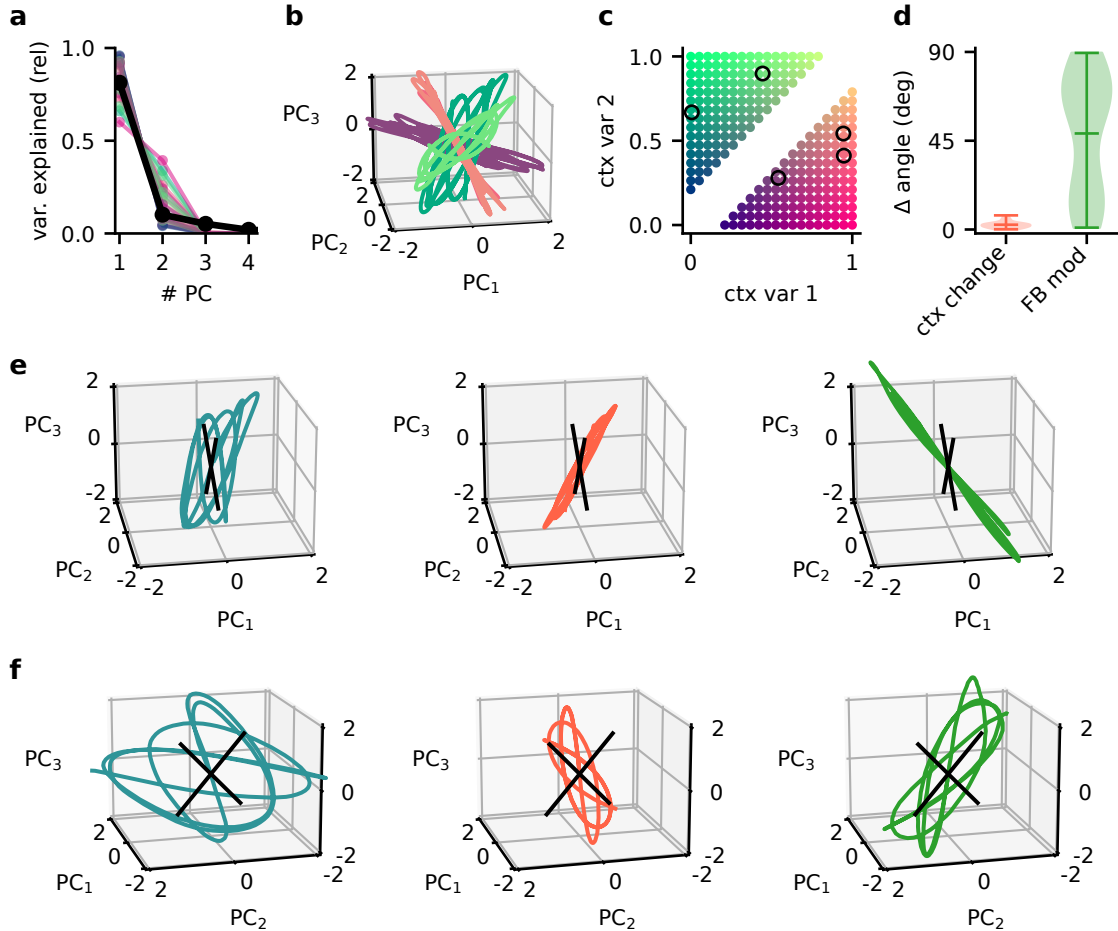

Supplement: supp [file elife-76096-supp-v1.zip]

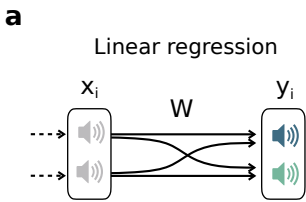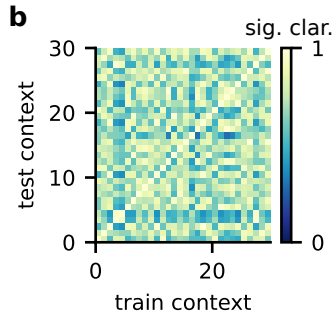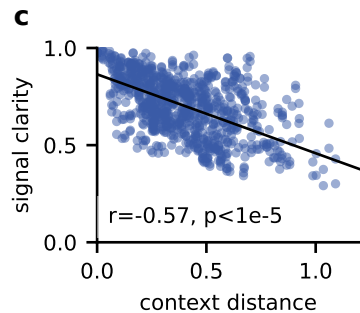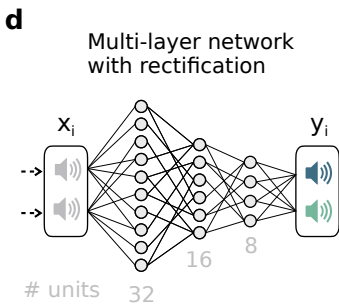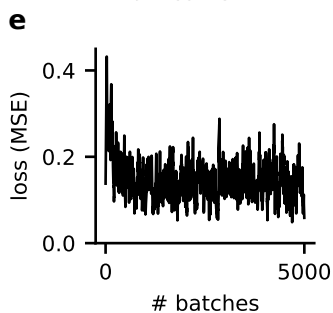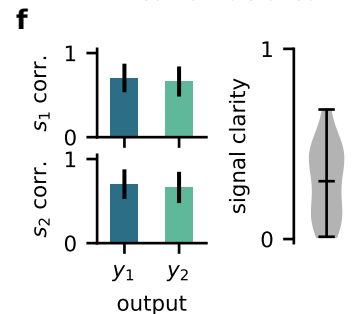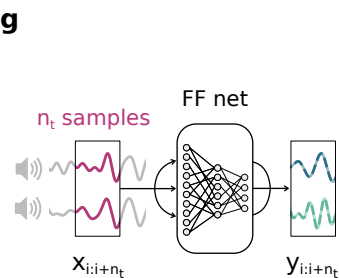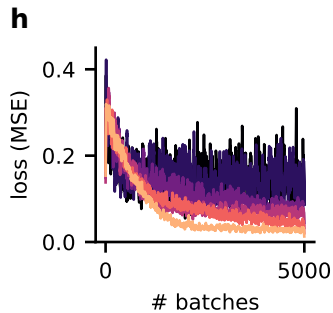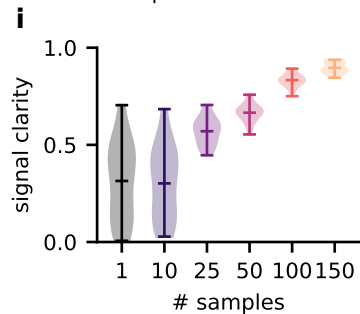

Supplement: supp [file elife-76096-supp-v1.zip]

**a**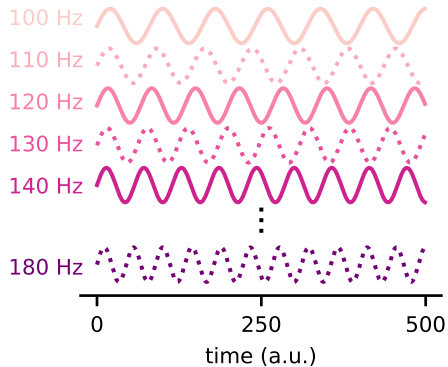**b**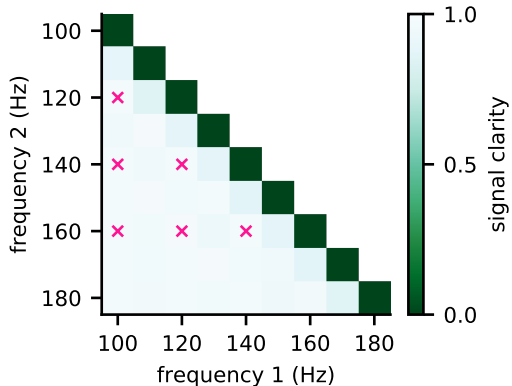

Supplement: supp [file elife-76096-supp-v1.zip]

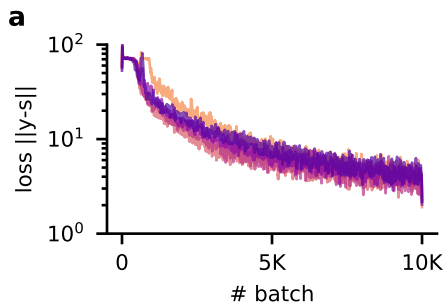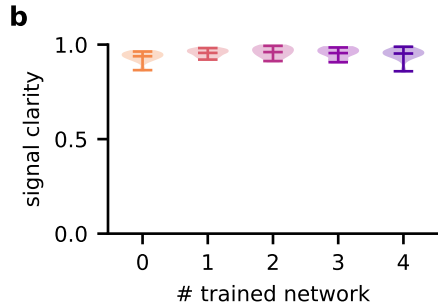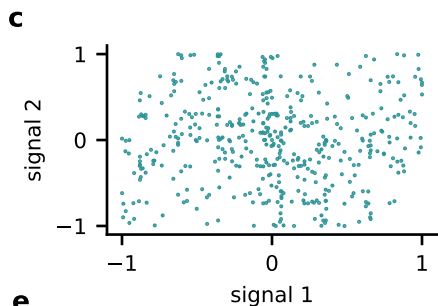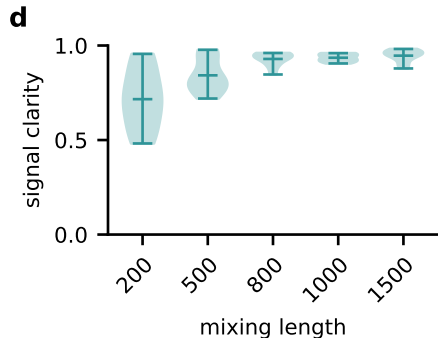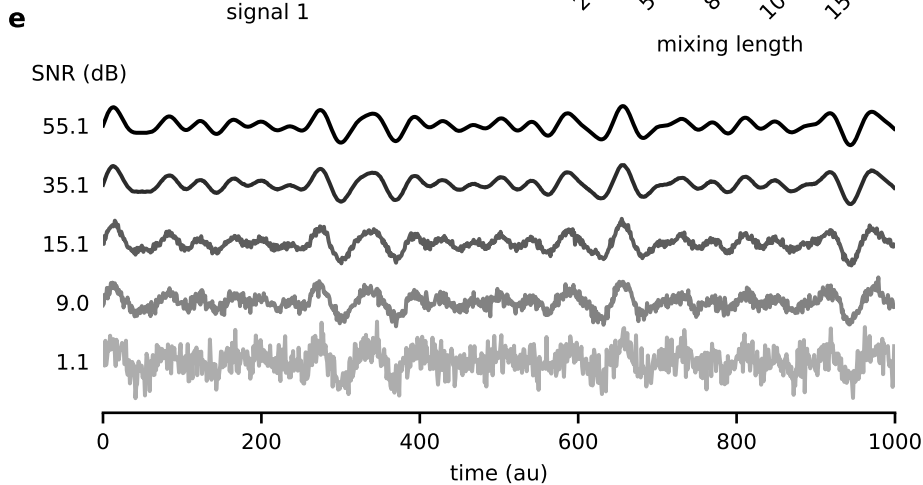

Supplement: supp [file elife-76096-supp-v1.zip]
